# Supplementary material for: HIV-Related Knowledge and Practices among Asian and African Migrants Living in Australia: Results from a Cross-Sectional Survey and Qualitative Study
Source: Int J Environ Res Public Health. 2023 Feb 28;20(5):4347. doi: 10.3390/ijerph20054347 (PMC10002009; doi:10.3390/ijerph20054347)
Supplement: Supplementary file 1 [file ijerph-20-04347-s001.zip › ijerph-2236932-supplementary.pdf]

**Table S1.** Variables mapped against relevant survey questions and response options

| Question                                                  | Responses                  | Variable name    | Variable type            | Variable components                    | Notes/definitions                                                                                                                                                                       |
|-----------------------------------------------------------|----------------------------|------------------|--------------------------|----------------------------------------|-----------------------------------------------------------------------------------------------------------------------------------------------------------------------------------------|
| How old are you?<br>(Tick one)                            | 18-29 years                | Age              | Categorical<br>(ordinal) | 18-29; 30-39; 40-49; 50-59; N/A<br>60+ |                                                                                                                                                                                         |
|                                                           | 30-39 years                |                  |                          |                                        |                                                                                                                                                                                         |
|                                                           | 40-49 years                |                  |                          |                                        |                                                                                                                                                                                         |
|                                                           | 50-59 years                |                  |                          |                                        |                                                                                                                                                                                         |
|                                                           | 60 years and over          |                  |                          |                                        |                                                                                                                                                                                         |
|                                                           | Prefer not to answer       |                  |                          |                                        |                                                                                                                                                                                         |
| How do you identify?<br>(Tick all that apply)             | Woman                      | Woman            | Categorical              | Yes – woman                            | Any of the following responses: woman + no other option selected; woman + cisgender; woman + transgender                                                                                |
|                                                           | Man                        |                  |                          | No – man                               | Any of the following responses: man + no other option selected; man + cisgender; man + transgender                                                                                      |
|                                                           | Non-binary person          |                  |                          |                                        |                                                                                                                                                                                         |
|                                                           | Transgender                |                  |                          |                                        |                                                                                                                                                                                         |
|                                                           | Cisgender                  |                  |                          | No - non-binary*                       | Any of the following responses: man + woman; transgender and no other option selected; non-binary person and no other option selected                                                   |
|                                                           | Other [open text]          |                  |                          |                                        |                                                                                                                                                                                         |
| What is the postcode in which you live?                   | Open text                  | State            | Categorical              | Western Australia                      | Any 6000-6999 postcode, any online survey with an embedded source code related to Western Australia, or any print survey known to be received from a Western Australian project officer |
|                                                           |                            |                  |                          | Queensland                             | Any 4000-4999 postcode, any online survey with an embedded source code related to Queensland, or any print survey known to be received from a Queensland project officer                |
|                                                           |                            |                  |                          | Victoria                               | Any 3000-3999 postcode, any online survey with an embedded source code related to Victoria, or any print survey known to be received from a Victorian project officer                   |
|                                                           |                            |                  |                          | South Australia                        | Any 5000-5999 postcode, any online survey with an embedded source code related to South Australia, or any print survey known to be received from a South Australian project officer     |
|                                                           |                            |                  |                          | Other                                  | Any Australian postcode from a state other than the four above                                                                                                                          |
|                                                           |                            | SEIFADecile      | Categorical<br>(ordinal) | 1-10                                   | Determined by mapping postcodes to Socioeconomic Indexes for Australia (SEIFA) 2016. A decile of 1 indicates lowest 10% of areas (most disadvantaged).                                  |
| What is your residency status in Australia?<br>(Tick one) | Permanent resident/citizen | PermanentCitizen | Categorical              | Yes – permanent/citizen                | Permanent resident/citizen selected                                                                                                                                                     |
|                                                           | Temporary – student visa   |                  |                          |                                        |                                                                                                                                                                                         |
|                                                           | Temporary – work visa      |                  |                          |                                        |                                                                                                                                                                                         |

|                                                              |                                                                                                             |             |             |                             |                                                                                                                                                                                                                                                                                                                                                                                                                                                                                                                                                                                      |
|--------------------------------------------------------------|-------------------------------------------------------------------------------------------------------------|-------------|-------------|-----------------------------|--------------------------------------------------------------------------------------------------------------------------------------------------------------------------------------------------------------------------------------------------------------------------------------------------------------------------------------------------------------------------------------------------------------------------------------------------------------------------------------------------------------------------------------------------------------------------------------|
|                                                              | Temporary – holiday/tourist visa<br>Temporary – partner visa<br>Other [open text]<br>I prefer not to answer |             |             | No – non-permanent          | Any of the temporary categories selected (or other if open text unable to be assigned to a predefined category)                                                                                                                                                                                                                                                                                                                                                                                                                                                                      |
| In which country were you born?                              | Open text for print survey<br>Choice of 67 countries for online survey                                      | BirthRegion | Categorical | Northeast Asia              | Any of the following responses: China (mainland); China (Hong Kong or Macau); Japan; Mongolia; North Korea; South Korea; Taiwan                                                                                                                                                                                                                                                                                                                                                                                                                                                      |
|                                                              |                                                                                                             |             |             | Southeast Asia              | Any of the following responses: Brunei; Burma (Myanmar); Cambodia; Indonesia; Laos; Malaysia; Philippines; Singapore; Thailand; Timor-Leste; Vietnam                                                                                                                                                                                                                                                                                                                                                                                                                                 |
|                                                              |                                                                                                             |             |             | Sub-Saharan Africa          | Any of the following responses: Angola; Benin; Botswana; Burkina Faso; Burundi; Cameroon; Cape Verde; Central African Republic; Chad; Comoros; Democratic Republic of Congo; Republic of Congo; Cote d'Ivoire; Equatorial Guinea; Eritrea; Eswatini; Ethiopia; Gabon; The Gambia; Ghana; Guinea; Guinea-Bissau; Kenya; Lesotho; Liberia; Madagascar; Malawi; Mali; Mauritania; Mauritius; Mozambique; Namibia; Niger; Nigeria; Rwanda; Sao Tome and Principe; Senegal; Seychelles; Sierra Leone; Somalia; South Africa; South Sudan; Sudan; Tanzania; Togo; Uganda; Zambia; Zimbabwe |
| How many years have you been living in Australia in total?   | Open text                                                                                                   | YearsInAus  | Continuous  | N/A                         | N/A                                                                                                                                                                                                                                                                                                                                                                                                                                                                                                                                                                                  |
| To whom are you sexually attracted?<br>(Tick all that apply) | Women                                                                                                       | MSM         | Categorical | Men attracted to men        | Any respondent allocated to variable 'Gender - Man' (see above) who responds 'Men' to sexual attraction question (even if other responses also chosen)                                                                                                                                                                                                                                                                                                                                                                                                                               |
|                                                              | Men<br>Non-binary people<br>Others [open text]<br>I prefer not to answer                                    |             |             | Men attracted to women only | Any respondent allocated to variable 'Gender - Man' (see above) who responds 'Women' to sexual attraction question (and no other response chosen)                                                                                                                                                                                                                                                                                                                                                                                                                                    |
| What are the main languages you speak at home?               | Open text                                                                                                   | English     | Categorical | English spoken at home      | English listed as one of the languages spoken at home                                                                                                                                                                                                                                                                                                                                                                                                                                                                                                                                |
|                                                              |                                                                                                             |             |             | English not spoken at home  | English not listed as one of the languages spoken at home                                                                                                                                                                                                                                                                                                                                                                                                                                                                                                                            |
| Have you heard of HIV and/or AIDS?<br>(Tick one)             | Yes                                                                                                         | HeardHIV    | Categorical | Heard                       | Anyone who answered 'No' excluded from subsequent analysis of HIV knowledge questions (KnowHIVTest, KnowViralLoad, KnowART, KnowPrEP)                                                                                                                                                                                                                                                                                                                                                                                                                                                |
|                                                              | No                                                                                                          |             |             | Not heard                   |                                                                                                                                                                                                                                                                                                                                                                                                                                                                                                                                                                                      |
|                                                              | Yes                                                                                                         | KnowHIVTest | Categorical | Correct                     | 'No' response                                                                                                                                                                                                                                                                                                                                                                                                                                                                                                                                                                        |
|                                                              | No                                                                                                          |             |             |                             |                                                                                                                                                                                                                                                                                                                                                                                                                                                                                                                                                                                      |

|                                                                                                                                                  |                                                                                         |                                        |                                         |                                                                                         |                                                                                                                                                                                                                                                                                                                                        |
|--------------------------------------------------------------------------------------------------------------------------------------------------|-----------------------------------------------------------------------------------------|----------------------------------------|-----------------------------------------|-----------------------------------------------------------------------------------------|----------------------------------------------------------------------------------------------------------------------------------------------------------------------------------------------------------------------------------------------------------------------------------------------------------------------------------------|
| Is an HIV test done whenever someone has a blood test in Australia? (Tick one)                                                                   | I don't know                                                                            |                                        |                                         | Not correct                                                                             | 'Yes' or 'I don't know' response                                                                                                                                                                                                                                                                                                       |
| Is it safe to have sex without a condom with someone who has VERY LOW amounts of HIV in their blood? (Tick one)                                  | Yes<br>No<br>I don't know                                                               | KnowViralLoad                          | Categorical                             | Correct<br><br>Not correct                                                              | 'Yes' response<br><br>'No' or 'I don't know' response                                                                                                                                                                                                                                                                                  |
| Are there any medicines that people can take BEFORE sex to protect themselves against HIV?                                                       | Yes<br>No<br>I don't know                                                               | KnowPrEP                               | Categorical                             | Correct<br><br>Not correct                                                              | 'Yes' response<br><br>'No' or 'I don't know' response; NOTE: Those who chose 'Yes' but then provided an incorrect name for the medicine were recoded 'Not Correct'                                                                                                                                                                     |
| If you think there is a medicine that people can take before sex to protect themselves against HIV, what is the name of the medicine? (Tick one) | The name of the medicine is: (open text)<br>I don't know the name of the medicine       | Know_Prep_Name                         | Categorical                             | Yes<br><br>No                                                                           | Responses include: PrEP, pre-exposure prophylaxis, tenofovir, Truvada or other recognized chemical or brand name<br><br>'I don't know' or incorrect name given                                                                                                                                                                         |
| Can a person have an STI without any symptoms? (Tick one)                                                                                        | Yes<br>No<br>I don't know                                                               | STI_Know_Sympt                         | Categorical                             | Correct<br><br>Not correct                                                              | 'Yes' response<br><br>'No' or 'I don't know' response                                                                                                                                                                                                                                                                                  |
| In the past twelve (12) months, how many people have you had sexual intercourse with (vaginal or anal)? (Tick one)                               | 0<br>1<br>2 to 5<br>6 to 10<br>11 or more<br>I prefer not to answer<br>I can't remember | AmtSexPartners1<br><br>AmtSexPartners2 | Categorical<br>(ordinal)<br>Categorical | 0; 1; 2-5; 6-10; 11+; Can't recall<br><br>One partner only<br><br>More than one partner | Anyone who answered '0', 'I prefer not to answer' or 'I can't remember' excluded from analysis for variables CommittedPartner, CondomUsed and NoCondomReason<br><br>'1' response<br><br>'2 to 5', '6 to 10' or '11 or more' responses<br>The purpose of this variable is only to include those who indicated they were sexually active |
| Which of the following best describes the MOST                                                                                                   |                                                                                         | CommittedPartner                       | Categorical                             | Committed                                                                               | 'Someone you are in a committed relationship with (e.g. husband / wife, boyfriend / girlfriend)' response                                                                                                                                                                                                                              |

|                                                                                                                                                        |                                                                                                |                 |             |                           |                                                                    |
|--------------------------------------------------------------------------------------------------------------------------------------------------------|------------------------------------------------------------------------------------------------|-----------------|-------------|---------------------------|--------------------------------------------------------------------|
| RECENT person you had sex with? (Tick one)                                                                                                             | Someone you are in a committed relationship with (e.g. husband / wife, boyfriend / girlfriend) |                 |             | Not committed             | 'A casual sex partner' or 'A sex worker' responses                 |
|                                                                                                                                                        | A casual sex partner                                                                           |                 |             |                           |                                                                    |
|                                                                                                                                                        | A sex worker                                                                                   |                 |             |                           |                                                                    |
| Did you use a condom the MOST RECENT time you had sex?                                                                                                 | Yes                                                                                            | CondomUsed      | Categorical | Used                      | 'Yes' response                                                     |
|                                                                                                                                                        | No                                                                                             |                 |             |                           |                                                                    |
|                                                                                                                                                        | I can't remember                                                                               |                 |             | Not used                  | 'No'                                                               |
|                                                                                                                                                        |                                                                                                |                 |             |                           | 'I can't remember' only included in basic descriptive analysis.    |
| Why did you NOT use a condom the MOST RECENT time you had sex (Tick as many as apply)                                                                  | My partner and/or I didn't have one                                                            | NoCondom_Reason | Categorical | See column 2              | Each response option was coded 1 if selected and 0 is not selected |
|                                                                                                                                                        | My partner and/or I couldn't afford one                                                        |                 |             |                           |                                                                    |
|                                                                                                                                                        | My partner did not want to use one                                                             |                 |             |                           |                                                                    |
|                                                                                                                                                        | I did not want to use one                                                                      |                 |             |                           |                                                                    |
|                                                                                                                                                        | My partner and/or I did not know where to get one                                              |                 |             |                           |                                                                    |
|                                                                                                                                                        | My partner doesn't like the way they feel                                                      |                 |             |                           |                                                                    |
|                                                                                                                                                        | I don't like the way they feel                                                                 |                 |             |                           |                                                                    |
|                                                                                                                                                        | My partner or I was trying to get pregnant                                                     |                 |             |                           |                                                                    |
|                                                                                                                                                        | It is against my or my partner's culture or religion                                           |                 |             |                           |                                                                    |
|                                                                                                                                                        | My partner and I don't have any illnesses that can be passed on through sex                    |                 |             |                           |                                                                    |
|                                                                                                                                                        | My partner and I trust each other                                                              |                 |             |                           |                                                                    |
|                                                                                                                                                        | Another reason (please specify)                                                                |                 |             |                           |                                                                    |
| When did you have your most recent test for HIV, hepatitis B, hepatitis C or any sexually transmitted infections (we call these STI and/or BBV tests)? | Less than 12 months ago                                                                        | TestedRecently  | Categorical | Within last two years     | 'Less than 12 months ago' or '1 to 2 years ago' response           |
|                                                                                                                                                        | 1 to 2 years ago                                                                               |                 |             |                           |                                                                    |
|                                                                                                                                                        | More than 2 years ago                                                                          |                 |             |                           |                                                                    |
|                                                                                                                                                        | I have never been tested                                                                       |                 |             | Not within last two years | 'More than two years ago', 'I have never been tested'              |
|                                                                                                                                                        | I don't know                                                                                   |                 |             |                           | 'I don't know' only included in basic descriptive analysis.        |

Note: it doesn't matter if  
the test was in Australia  
or another country

(Tick one)

|                                                                                            |                                                                                                                                                                                                                                                                                                                                                                                                                                                                                                               |         |             |                            |                                                                                                                                                                                                                                                                                                                                                     |
|--------------------------------------------------------------------------------------------|---------------------------------------------------------------------------------------------------------------------------------------------------------------------------------------------------------------------------------------------------------------------------------------------------------------------------------------------------------------------------------------------------------------------------------------------------------------------------------------------------------------|---------|-------------|----------------------------|-----------------------------------------------------------------------------------------------------------------------------------------------------------------------------------------------------------------------------------------------------------------------------------------------------------------------------------------------------|
| What was your MOST RECENT STI and/or BBV test for?                                         | HIV<br>Chlamydia and / or gonorrhoea<br>Syphilis<br>Hepatitis B and / or hepatitis C<br>I don't know – it was a blood test<br>I don't know – it was a urine test<br>I don't know – it was a blood and urine test<br>Other [open text]                                                                                                                                                                                                                                                                         | HIVTest | Categorical | HIV test<br><br>Other test | 'HIV' response (either alone or in combination with another response)<br><br>'Chlamydia and/or gonorrhoea' or 'Syphilis' or 'Hepatitis B and / or hepatitis C' or 'I don't know – it was a urine test' response without 'HIV' also being chosen<br><br>Two 'I do not know – it was a blood test' option only included in basic descriptive analysis |
| Why did you NOT have an STI and/or BBV test in the last two years? (Tick as many as apply) | I did not do anything to put me at risk<br>I was too embarrassed<br>I could not afford extra tests<br>I didn't know where to get one<br>I was scared about the result<br>I don't like needles/blood tests<br>I did not have any symptoms<br>I did not have the time to get tested<br>I did not think it was important<br>I couldn't get to a service/clinic<br>Another reason (open text)                                                                                                                     | Various | Categorical | See column 2               | Multiple responses permitted                                                                                                                                                                                                                                                                                                                        |
| What was the reason for your MOST RECENT STI and/or BBV test? (Tick as many as apply)      | I was applying for permanent residency<br>I had a new sexual partner<br>I shared injecting equipment with someone<br>Something happened that may have put me at risk<br>I was pregnant and had a check up<br>I was getting contraception/birth control<br>My doctor/nurse suggested it<br>My doctor/nurse just did it<br>I wanted to know if I had a sexually transmitted infection or a blood-borne virus<br>I had symptoms<br>It was part of my regular health check<br>I like to get regular STI/BBV tests | Various | Categorical | See column 2               | Each response option was coded 1 if selected and 0 is not selected                                                                                                                                                                                                                                                                                  |

|                                                                                                                                                                  |                                                                                                                                                                                                                                                                                                 |                  |             |                                    |                                                                                                                                                                                                            |
|------------------------------------------------------------------------------------------------------------------------------------------------------------------|-------------------------------------------------------------------------------------------------------------------------------------------------------------------------------------------------------------------------------------------------------------------------------------------------|------------------|-------------|------------------------------------|------------------------------------------------------------------------------------------------------------------------------------------------------------------------------------------------------------|
|                                                                                                                                                                  | It was a requirement for my work/study<br>Another reason (open text)                                                                                                                                                                                                                            |                  |             |                                    |                                                                                                                                                                                                            |
| How would you feel if a doctor in Australia offered you STI and BBV tests during an appointment without you requesting any of these tests? (Tick any that apply) | Offended – why are they asking me<br>Worried – do they think I have an illness?<br>Surprised – I wasn’t expecting that<br>Okay – STI and BBV testing is normal<br>Relieved – now I don’t have to ask for the tests<br>Embarrassed – I’d rather not talk about these things<br>Other (open text) | Various          | Categorical | See column 2                       | Each response option was coded 1 if selected and 0 is not selected                                                                                                                                         |
| If a close friend in Australia told you that they were going to get tested for STIs and BBVs, how would you feel? (Tick any that apply)                          | Fine – it’s none of my business<br>Shocked – I didn’t think they would need to get tested<br>Proud – it’s a responsible thing to do<br>Supportive – I am here if they need my help<br>Worried – I hope they are okay<br>Disappointed – they must have done something wrong<br>Other (open text) | Various          | Categorical | See column 2                       | Each response option was coded 1 if selected and 0 is not selected                                                                                                                                         |
| Since January 2018, how many times have you visited any country outside of Australia? (Tick one)                                                                 | 0<br>1 to 2 times<br>3 to 4 times<br>5 to 6 times<br>7 or more times<br>I can’t remember the number of times                                                                                                                                                                                    | OverseasTravel   | Categorical | Travel<br><br>No Travel            | ‘1 to 2 times’, ‘3 to 4 times’, ‘5 to 6 times’, ‘7 or more times’ or ‘I can’t remember the number of times’<br><br>‘0’<br><br>Anyone who answered ‘0’ excluded from analysis for variable TravelCondomUsed |
| On any of the overseas visits since January 2018, did you have sexual intercourse with at least one person who lives outside of Australia? (Tick one)            | Yes<br>No<br>I prefer not to answer                                                                                                                                                                                                                                                             | TravelCondomUsed | Categorical | Condom used<br><br>Condom not used | ‘Yes’ response<br><br>‘No response’                                                                                                                                                                        |
